# Supplementary material for: Clinical Experience With High-Dosage Pramipexole in Patients With Treatment-Resistant Depressive Episodes in Unipolar and Bipolar Depression
Source: Atypon-hosted journal article supplement (doi:10.1176/appi.ajp.2015.15060788), 2016-02-01
Supplement: appi.ajp.2015.15060788.ds001.pdf [file appi.ajp.2015.15060788.ds001.pdf]

**TABLE S1. Demographic and Clinical Characteristics and Outcomes of 42 Patients With Treatment-Resistant Depression Treated With Pramipexole**

| Patient | Age (years) | Sex | Diagnosis <sup>a</sup> | Severity | Impairment | Maximum Dosage of Pramipexole (mg/day) | Outcome     | Length of Follow-Up on Pramipexole (months) |
|---------|-------------|-----|------------------------|----------|------------|----------------------------------------|-------------|---------------------------------------------|
| 1       | 57          | M   | MDD                    | 4/5      | 2/5        | 5.0                                    | Remission   | 36                                          |
| 2       | 54          | M   | BP-II                  | 4/5      | 3/5        | 3.0                                    | Remission   | 60                                          |
| 3       | 57          | F   | MDD                    | 4/5      | 4/5        | 3.0                                    | Remission   | 12                                          |
| 4       | 67          | F   | MDD, PD                | 2/5      | 2/5        | 1.5                                    | Remission   | 12                                          |
| 5       | 25          | M   | MDD                    | 4/5      | 2/5        | 5.0                                    | Response    | 6                                           |
| 6       | 84          | M   | BP-II                  | 3/5      | 2/5        | 2.5                                    | Remission   | 36                                          |
| 7       | 41          | M   | BP-I                   | 2/5      | 2/5        | 2.0                                    | Intolerant  | <1                                          |
| 8       | 66          | M   | BP-II                  | 3/5      | 3/5        | 1.0                                    | Nonresponse | 3                                           |
| 9       | 66          | F   | BP-II (RC)             | 3/5      | 3/5        | 2.0                                    | Remission   | 12                                          |
| 10      | 70          | F   | BPS                    | 2/5      | 3/5        | 2.0                                    | Remission   | 12                                          |
| 11      | 69          | F   | BP-I                   | 4/5      | 4/5        | 2.0                                    | Remission   | 24                                          |
| 12      | 76          | M   | MDD                    | 3/5      | 2/5        | 2.0                                    | Remission   | 18                                          |
| 13      | 67          | M   | MDD                    | 4/5      | 2/5        | 1.0                                    | Remission   | 36                                          |
| 14      | 54          | F   | BP-I                   | 3/5      | 1/5        | 1.0                                    | Response    | 18                                          |
| 15      | 33          | F   | MDD                    | 3/5      | 3/5        | 0.75                                   | Remission   | 36                                          |
| 16      | 57          | F   | BPS                    | 3/5      | 2/5        | 1.0                                    | Remission   | 12                                          |
| 17      | 58          | F   | MDD                    | 3/5      | 2/5        | 3.0                                    | Intolerant  | <1                                          |
| 18      | 58          | F   | MDD, PTSD              | 4/5      | 4/5        | 3.0                                    | Response    | 6                                           |
| 19      | 65          | M   | BP-II                  | 2/5      | 2/5        | 3.0                                    | Response    | 12                                          |
| 20      | 43          | M   | BP-I                   | 3/5      | 3/5        | 2.0                                    | Intolerant  | 3                                           |
| 21      | 65          | F   | BPS                    | 4/5      | 4/5        | 3.0                                    | Remission   | 36                                          |
| 22      | 47          | M   | BPS                    | 3/5      | 3/5        | 1.0                                    | Intolerant  | 3                                           |
| 23      | 42          | F   | MDD                    | 2/5      | 2/5        | 1.5                                    | Remission   | 6                                           |
| 24      | 65          | M   | BP-II                  | 3/5      | 2/5        | 3.0                                    | Remission   | 18                                          |
| 25      | 45          | M   | BP-I                   | 3/5      | 3/5        | 1.0                                    | Response    | 12                                          |
| 26      | 51          | M   | MDD, GAD               | 4/5      | 3/5        | 2.0                                    | Response    | 1                                           |
| 27      | 35          | F   | MDD, OCD               | 4/5      | 4/5        | 2.5                                    | Response    | 3                                           |
| 28      | 73          | M   | BP-II                  | 4/5      | 4/5        | 2.0                                    | Response    | 1                                           |
| 29      | 36          | F   | MDD                    | 4/5      | 4/5        | 2.5                                    | Response    | 12                                          |
| 30      | 57          | M   | MDD, MS                | 4/5      | 5/5        | 3.5                                    | Remission   | 12                                          |
| 31      | 57          | F   | MDD                    | 3/5      | 5/5        | 3.5                                    | Response    | 6                                           |
| 32      | 44          | F   | MDD                    | 3/5      | 3/5        | 0.5                                    | Intolerant  | <1                                          |
| 33      | 43          | M   | MDD                    | 3/5      | 4/5        | 0.5                                    | Intolerant  | <1                                          |
| 34      | 41          | F   | MDD                    | 4/5      | 2/5        | 2.0                                    | Remission   | 36                                          |
| 35      | 57          | M   | BP-II (RC)             | 4/5      | 3/5        | 3.0                                    | Remission   | 1                                           |
| 36      | 47          | F   | BP-I, PTSD             | 4/5      | 4/5        | 3.0                                    | Response    | 3                                           |

*continued*

TABLE S1, continued

| Patient | Age (years) | Sex | Diagnosis <sup>a</sup> | Severity | Impairment | Maximum Dosage of Pramipexole (mg/day) | Outcome                 | Length of Follow-Up on Pramipexole (months) |
|---------|-------------|-----|------------------------|----------|------------|----------------------------------------|-------------------------|---------------------------------------------|
| 37      | 57          | M   | MDD/MS/PAs             | 4/5      | 4/5        | 3.75                                   | Remission               | 7                                           |
| 38      | 31          | F   | MDD                    | 3/5      | 2/5        | 0.75                                   | Remission               | 24                                          |
| 39      | 49          | M   | MDD                    | 2/5      | 3/5        | 0.75                                   | Intolerant <sup>b</sup> | <1                                          |
| 40      | 44          | F   | MDD, CPS               | 4/5      | 4/5        | 4.0                                    | Response                | 6                                           |
| 41      | 61          | M   | MDD                    | 4/5      | 3.5        | 0.5                                    | Intolerant <sup>b</sup> | <1                                          |
| 42      | 53          | F   | MDD, PTSD              | 4/5      | 4/5        | 2.0                                    | Nonresponse             | 2                                           |

<sup>a</sup> BP-I, BP-II=bipolar I, bipolar II disorder; BPS=bipolar disorder, specified; CPS=chronic paranoid schizophrenia; GAD=generalized anxiety disorder; MDD=major depressive disorder; MS=multiple sclerosis; OCD=obsessive-compulsive disorder; PAs=panic attacks; PD=panic disorder; PTSD=posttraumatic stress disorder; RC=rapid cycling.

<sup>b</sup> Discontinued because of nausea.

**TABLE S2. Treatments Prior to Pramipexole in 42 Patients With Treatment-Resistant Depression<sup>a</sup>**

| Patient | Number of Trials |      |                          |           |                             |         |                |                        |       | Comments                                                                                                         |
|---------|------------------|------|--------------------------|-----------|-----------------------------|---------|----------------|------------------------|-------|------------------------------------------------------------------------------------------------------------------|
|         | SSRI             | SNRI | Tricyclic Antidepressant | Bupropion | Monoamine Oxidase Inhibitor | Lithium | Anticonvulsant | Atypical Antipsychotic | ECT   |                                                                                                                  |
| 1       | 3                | 1    | 1                        | 1         | 1                           | 1       | 0              | 1                      | 8     |                                                                                                                  |
| 2       | 3                | 0    | 1                        | 1         | 1                           | 1       | 1              | 1                      | 12    | Vagus nerve stimulation therapy added                                                                            |
| 3       | 3                | 1    | 1                        | 1         | 0                           | 1       | 1              | 1                      | 12    |                                                                                                                  |
| 4       | 3                | 2    | 2                        | 1         | 0                           | 1       | 1              | 1                      | 9     |                                                                                                                  |
| 5       | 3                | 2    | 1                        | 1         | 1                           | 1       | 0              | 1                      | 30–40 |                                                                                                                  |
| 6       | 2                | 1    | 0                        | 1         | 0                           | 1       | 1              | 0                      | 0     |                                                                                                                  |
| 7       | 3                | 1    | 0                        | 1         | 0                           | 1       | 1              | 1                      | 0     |                                                                                                                  |
| 8       | 3                | 2    | 1                        | 1         | 0                           | 1       | 2              | 0                      | 0     |                                                                                                                  |
| 9       | 3                | 3    | 1                        | 0         | 0                           | 1       | 2              | 2                      | 0     | Discontinued pramipexole, restarted <sup>b</sup>                                                                 |
| 10      | 3                | 1    | 1                        | 0         | 0                           | 0       | 1              | 0                      | 0     | Relapsed while on pramipexole at 12 months                                                                       |
| 11      | 3                | 1    | 1                        | 1         | 0                           | 1       | 2              | 0                      | 0     |                                                                                                                  |
| 12      | 2                | 1    | 0                        | 1         | 0                           | 0       | 0              | 0                      | 0     | Discontinued pramipexole due to irritability, depression did not return                                          |
| 13      | 3                | 1    | 1                        | 0         | 0                           | 0       | 0              | 0                      | 0     | Dopamine abrupt withdrawal syndrome                                                                              |
| 14      | 3                | 1    | 0                        | 1         | 0                           | 1       | 2              | 1                      | 0     |                                                                                                                  |
| 15      | 2                | 1    | 0                        | 1         | 0                           | 0       | 1              | 0                      | 0     | Discontinued pramipexole, restarted <sup>b</sup>                                                                 |
| 16      | 2                | 1    | 1                        | 1         | 0                           | 1       | 0              | 1                      | 0     | Discontinued pramipexole, restarted <sup>b</sup>                                                                 |
| 17      | 2                | 1    | 1                        | 0         | 0                           | 0       | 0              | 0                      | 0     |                                                                                                                  |
| 18      | 2                | 0    | 1                        | 1         | 0                           | 0       | 0              | 0                      | 0     | Prazosin for posttraumatic stress disorder symptoms                                                              |
| 19      | 2                | 0    | 0                        | 1         | 0                           | 1       | 1              | 0                      | 0     | Discontinued pramipexole, restarted                                                                              |
| 20      | 2                | 2    | 1                        | 1         | 0                           | 1       | 1              | 1                      | 0     | Discontinued pramipexole, restarted                                                                              |
| 21      | 3                | 1    | 1                        | 1         | 0                           | 1       | 1              | 0                      | 0     |                                                                                                                  |
| 22      | 3                | 2    | 2                        | 1         | 1                           | 1       | 4              | 2                      | 0     |                                                                                                                  |
| 23      | 3                | 2    | 0                        | 1         | 0                           | 0       | 0              | 0                      | 0     | Discontinued pramipexole due to pregnancy and became depressed                                                   |
| 24      | 3                | 2    | 1                        | 1         | 0                           | 1       | 3              | 2 <sup>c</sup>         | 0     | Pramipexole caused sexual arousal. Perphenazine used as mood stabilizer. Relapsed on pramipexole after 18 months |
| 25      | 3                | 1    | 0                        | 1         | 0                           | 1       | 1              | 2                      | 0     | Opioid user                                                                                                      |
| 26      | 2                | 3    | 1                        | 1         | 0                           | 0       | 0              | 1 <sup>c</sup>         | 12    |                                                                                                                  |
| 27      | 3                | 1    | 2                        | 1         | 0                           | 1       | 0              | 1 <sup>c</sup>         | 14    |                                                                                                                  |
| 28      | 5                | 3    | 1                        | 1         | 1                           | 1       | 3              | 4 <sup>c</sup>         | 5     | Vagus nerve stimulation therapy added                                                                            |

*continued*

TABLE S2, continued

| Patient | Number of Trials |      |                          |           |                             |         |                |                        |     | Comments                                                                  |
|---------|------------------|------|--------------------------|-----------|-----------------------------|---------|----------------|------------------------|-----|---------------------------------------------------------------------------|
|         | SSRI             | SNRI | Tricyclic Antidepressant | Bupropion | Monoamine Oxidase Inhibitor | Lithium | Anticonvulsant | Atypical Antipsychotic | ECT |                                                                           |
| 29      | 3                | 1    | 1                        | 1         | 0                           | 0       | 0              | 0                      | 0   |                                                                           |
| 30      | 3                | 2    | 1                        | 1         | 1                           | 0       | 2              | 0                      | 0   |                                                                           |
| 31      | 3                | 2    | 1                        | 1         | 0                           | 1       | 2              | 0                      | 0   |                                                                           |
| 32      | 2                | 2    | 0                        | 1         | 0                           | 0       | 0              | 1                      | 0   |                                                                           |
| 33      | 3                | 2    | 1                        | 1         | 0                           | 0       | 0              | 1                      | 0   |                                                                           |
| 34      | 2                | 2    | 0                        | 1         | 0                           | 0       | 0              | 0                      | 0   |                                                                           |
| 35      | 2                | 2    | 0                        | 1         | 1                           | 1       | 0              | 1                      | 0   |                                                                           |
| 36      | 2                | 1    | 0                        | 1         | 1                           | 1       | 2              | 2                      | 0   |                                                                           |
| 37      | 2                | 2    | 1                        | 1         | 0                           | 0       | 2              | 2                      | 0   | Pregabalin added; low-dosage naltrexone and testosterone added            |
| 38      | 3                | 2    | 1                        | 1         | 0                           | 0       | 0              | 0                      | 0   | Had panic attacks                                                         |
| 39      | 2                | 1    | 1                        | 1         | 0                           | 0       | 1              | 0                      | 0   |                                                                           |
| 40      | 2                | 1    | 0                        | 1         | 0                           | 0       | 0              | 1                      | 0   | History of methamphetamine use while on long-acting injection risperidone |
| 41      | 1                | 2    | 2                        | 0         | 0                           | 0       | 0              | 0                      | 0   |                                                                           |
| 42      | 3                | 2    | 2                        | 1         | 0                           | 0       | 0              | 0                      | 0   | Stimulants added                                                          |

<sup>a</sup> SNRI=serotonin-norepinephrine reuptake inhibitor; SSRI=selective serotonin reuptake inhibitor.

<sup>b</sup> Discontinued for various reasons, became depressed, then once pramipexole was restarted, depression responded again.

<sup>c</sup> Aripipizole was used.
